# Supplementary material
Source: Springer Nature journal article supplement (https://www.springermedizin.de/resource/supplementary/13054_2009_8337_MOESM2_ESM.pdf/9731740)

**Inflammatory response and immune function**

*Cell proliferation  
Cell circulation  
Cell function  
Cell lysis and Apoptosis*

**Cortisol**

**Adrenal**

**ACTH**

**Pituitary**

**D1 receptors**

**PVN**

**μ, κ, δ**

**CRH**

**AVP**

**Physical stressors**

**Infection  
Inflammation**

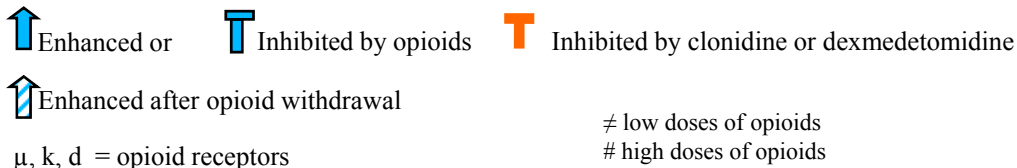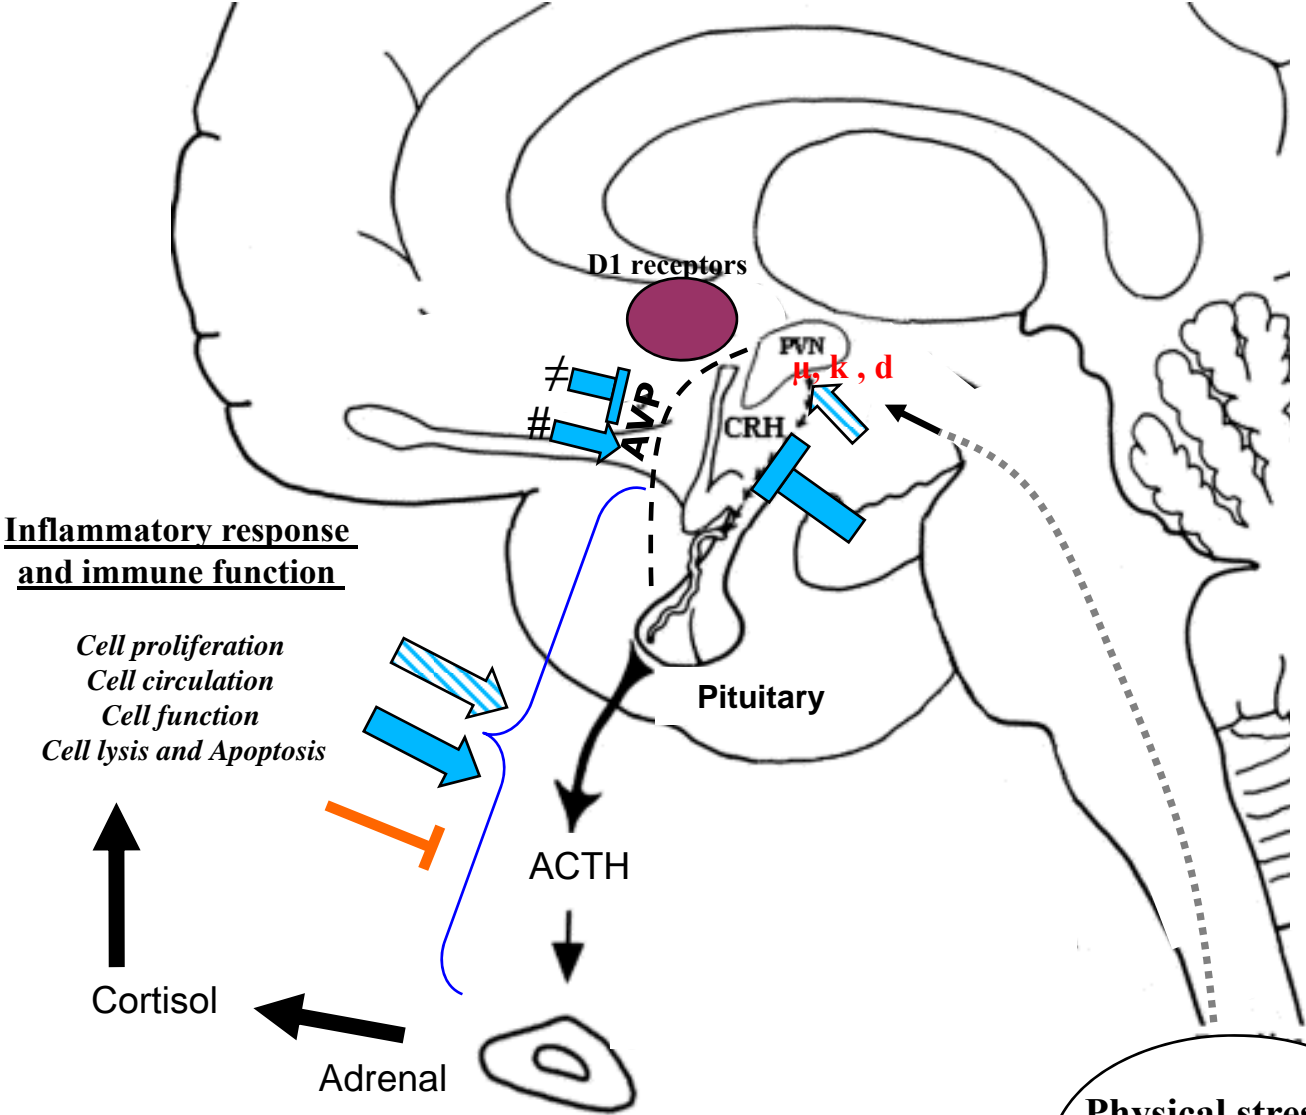

Supplement: MOESM2 [file 9731740]
